# Supplementary material
Source: MDPI journal article supplement (https://www.mdpi.com/2077-0472/14/3/340)
Supplement: s1 [file s1]

Archive with 2 entries (2 files):
- Supplementary Figure S1-S2.pdf
- Supplementary Table S1-S5.pdf
